# Supplementary material for: Promoting fast Na-storage and fabricating a stable layered cathode for sodium-ion batteries via site-selective substitution in triple crystallographic sites
Source: Royal Society of Chemistry journal article supplement (doi:10.1039/d4ta03803g), 2024-01-01
Supplement: d4ta03803g1.pdf [file d4ta03803g1.pdf]

**Promoting the fast Na-storage and stable layered cathode for sodium-ion batteries by a site-selective substitution in triple crystallographic sites**

Zheng-Yao Li<sup>1</sup>, Xiaobai Ma<sup>1</sup>, Kai Sun<sup>1\*</sup>, Fanghua Ning<sup>2\*</sup>, Limei Sun<sup>1</sup>, Gengfang Tian<sup>1</sup>, Jianxiang Gao<sup>1</sup>, Hongliang Wang<sup>1</sup>, Dongfeng Chen<sup>1\*</sup>

<sup>1</sup> Neutron Scattering Laboratory, Department of Nuclear Physics, China Institute of Atomic Energy, Beijing 102413, People's Republic of China

<sup>2</sup> Institute for Sustainable Energy/College of Sciences, Shanghai University, Shanghai 200444, People's Republic of China

\*E-mail: [ksun@ciae.ac.cn](mailto:ksun@ciae.ac.cn) (K. Sun)

\*E-mail: [fhning@shu.edu.cn](mailto:fhning@shu.edu.cn) (F. Ning)

\*E-mail: [dongfeng@ciae.ac.cn](mailto:dongfeng@ciae.ac.cn) (D. Chen)

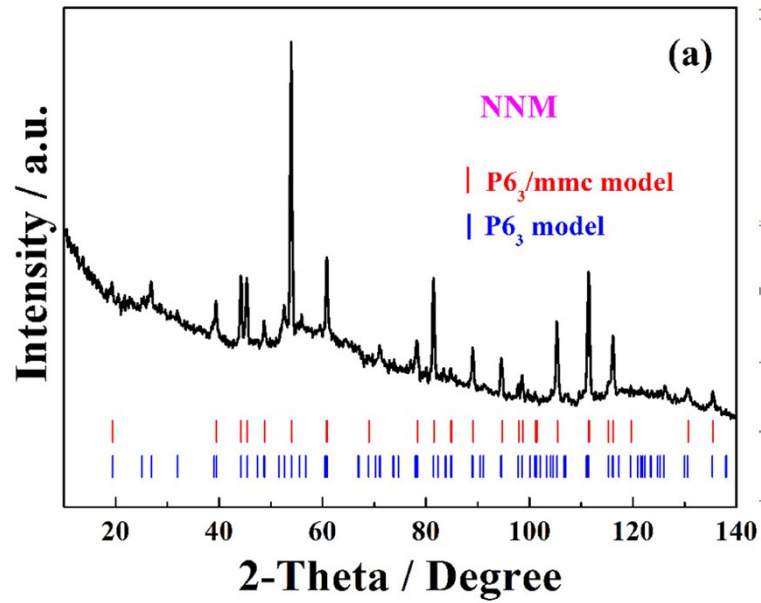

**Figure S1** (a) Comparison of the neutron powder diffraction (NPD) data using  $P6_3/mmc$  and  $P6_3$  space groups.

**Table S1** Refined crystal sites and atom occupancies of the NNM sample by XRD data.  
(Space group of  $P6_3/mmc$ )

| Atom            | Site | x   | y   | z       |
|-----------------|------|-----|-----|---------|
| Na <sub>1</sub> | 2b   | 0   | 0   | 1/4     |
| Na <sub>2</sub> | 2d   | 1/3 | 2/3 | 1/4     |
| Mn              | 2a   | 0   | 0   | 0       |
| Ni              | 2a   | 0   | 0   | 0       |
| O               | 4f   | 1/3 | 2/3 | 0.09048 |

**Table S2** Refined crystal sites and atom occupancies of the doped-NNM sample by XRD data. (Space group of  $P6_3/mmc$ )

| Atom            | Site | x   | y   | z       |
|-----------------|------|-----|-----|---------|
| Na <sub>1</sub> | 2b   | 0   | 0   | 1/4     |
| Ca <sub>1</sub> | 2b   | 0   | 0   | 1/4     |
| Na <sub>2</sub> | 2d   | 1/3 | 2/3 | 1/4     |
| Ca <sub>2</sub> | 2d   | 1/3 | 2/3 | 1/4     |
| Mn              | 2a   | 0   | 0   | 0       |
| Ni              | 2a   | 0   | 0   | 0       |
| Li              | 2a   | 0   | 0   | 0       |
| O               | 4f   | 1/3 | 1/3 | 0.09091 |
| F               | 4f   | 1/3 | 1/3 | 0.09091 |

**Table S3** Refined crystal sites and atom occupancies of the NNM sample by NPD data using super cell model. (Space group of  $P6_3$ ,  $R_p\%$  = 2.22,  $R_{wp}\%$  = 3.00)

| Atom                              | Site | x      | y      | z       |
|-----------------------------------|------|--------|--------|---------|
| Na <sub>1</sub>                   | 2a   | 0      | 0      | 1/4     |
| Na <sub>2</sub>                   | 6c   | 1/3    | 0      | 1/4     |
| Na <sub>3</sub>                   | 2b   | 1/3    | 2/3    | 1/4     |
| Na <sub>4</sub>                   | 2b   | 2/3    | 1/3    | 1/4     |
| Mn <sub>1</sub> / Ni <sub>1</sub> | 2a   | 0      | 0      | 0       |
| Mn <sub>2</sub> / Ni <sub>2</sub> | 2b   | 1/3    | 2/3    | 1/2     |
| Mn <sub>3</sub> / Ni <sub>3</sub> | 2b   | 1/3    | 2/3    | 0       |
| O <sub>1</sub>                    | 6c   | 0.3383 | 0.0059 | -0.4303 |
| O <sub>2</sub>                    | 6c   | 0.6545 | 0.0259 | 0.3882  |

**Table S4** Refined crystal sites and atom occupancies of the doped-NNM sample by NPD data using super cell model. (Space group of  $P6_3$ ,  $R_p\% = 2.71$ ,  $R_{wp}\% = 3.69$ )

| Atom                                              | Site | x      | y      | z       |
|---------------------------------------------------|------|--------|--------|---------|
| Na <sub>1</sub>                                   | 2a   | 0      | 0      | 1/4     |
| Na <sub>2</sub>                                   | 6c   | 1/3    | 0      | 1/4     |
| Ca                                                | 6c   | 1/3    | 0      | 1/4     |
| Na <sub>3</sub>                                   | 2b   | 1/3    | 2/3    | 1/4     |
| Na <sub>4</sub>                                   | 2b   | 2/3    | 1/3    | 1/4     |
| Mn <sub>1</sub> /Ni <sub>1</sub> /Li <sub>1</sub> | 2a   | 0      | 0      | 0       |
| Mn <sub>2</sub> /Ni <sub>1</sub> /Li <sub>1</sub> | 2b   | 1/3    | 2/3    | 1/2     |
| Mn <sub>3</sub> /Ni <sub>1</sub> /Li <sub>1</sub> | 2b   | 1/3    | 2/3    | 0       |
| O <sub>1</sub> /F <sub>1</sub>                    | 6c   | 0.3814 | 0.0276 | -0.3800 |
| O <sub>2</sub> /F <sub>2</sub>                    | 6c   | 0.6702 | 0.0090 | 0.4399  |

**Table S5** Refined lattice parameters of all the materials based on XRD data.

| Sample    | a = b (Å) | c (Å)   | Factors (%)                                      |
|-----------|-----------|---------|--------------------------------------------------|
| NNM       | 2.8923    | 11.1739 | $R_p = 4.79$ , $R_{wp} = 6.63$ , $\chi^2 = 2.43$ |
| Doped-NNM | 2.8848    | 11.0496 | $R_p = 4.39$ , $R_{wp} = 5.93$ , $\chi^2 = 2.14$ |
| Ca-NNM    | 2.8888    | 11.1609 | $R_p = 4.82$ , $R_{wp} = 6.51$ , $\chi^2 = 2.28$ |
| Li-NNM    | 2.8870    | 11.0374 | $R_p = 4.48$ , $R_{wp} = 6.10$ , $\chi^2 = 2.44$ |

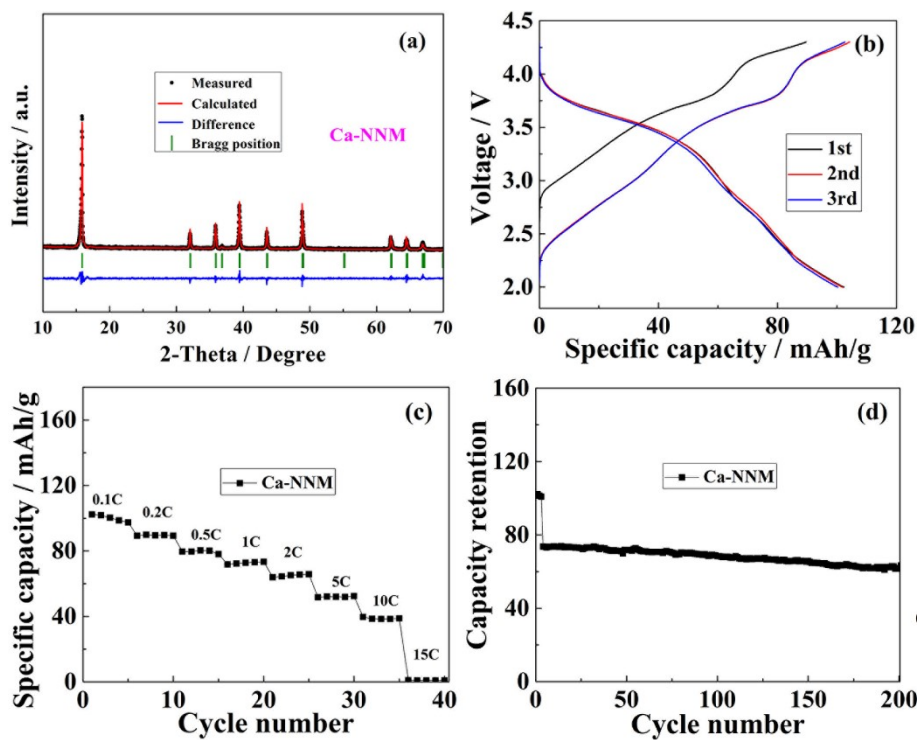

**Figure S2** (a) XRD plot of single Ca-doped cathode material (Ca-NNM), (b) Initial charge/discharge profiles, (c) Rate capability and (d) Cycling performance of Ca-NNM cathode at 1C in the voltage of 2.0 - 4.3 V.

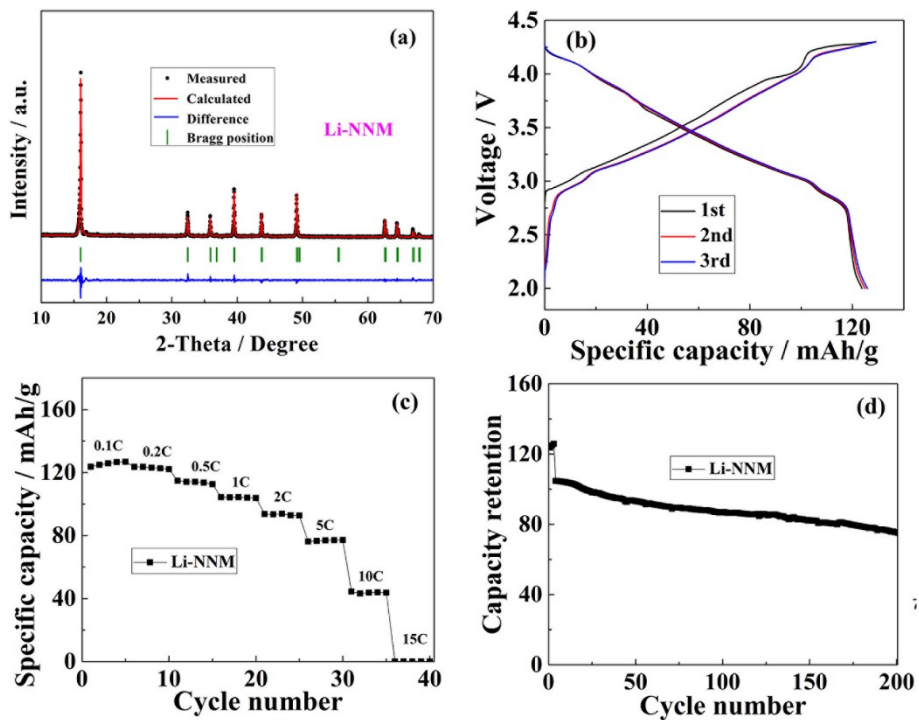

**Figure S3** (a) XRD plot of single Li-doped cathode material (Li-NNM), (b) Initial charge/discharge profiles, (c) Rate capability and (d) Cycling performance of Li-NNM cathode at 1C in the voltage of 2.0 - 4.3 V.

**Table S6** Comparison of electrochemical performance of all the as-prepared cathode materials.

| Sample        | Specific capacity (mAh g <sup>-1</sup> ) |      |      |     |    |    |     |     | Cycling Stability |
|---------------|------------------------------------------|------|------|-----|----|----|-----|-----|-------------------|
|               | 0.1 C                                    | 0.2C | 0.5C | 1C  | 2C | 5C | 10C | 15C |                   |
| NNM           | 166                                      | 126  | 93   | 79  | 58 | 28 | 0   | 0   | 20/79 =<br>25.3%  |
| Doped-<br>NNM | 117                                      | 114  | 109  | 104 | 99 | 89 | 76  | 64  | 91/104=<br>87.5%  |
| Ca-NNM        | 102                                      | 90   | 79   | 73  | 65 | 51 | 38  | 0   | 62/73=<br>84.9%   |
| Li-NNM        | 125                                      | 123  | 113  | 104 | 93 | 76 | 45  | 0   | 74/104=<br>71.1%  |

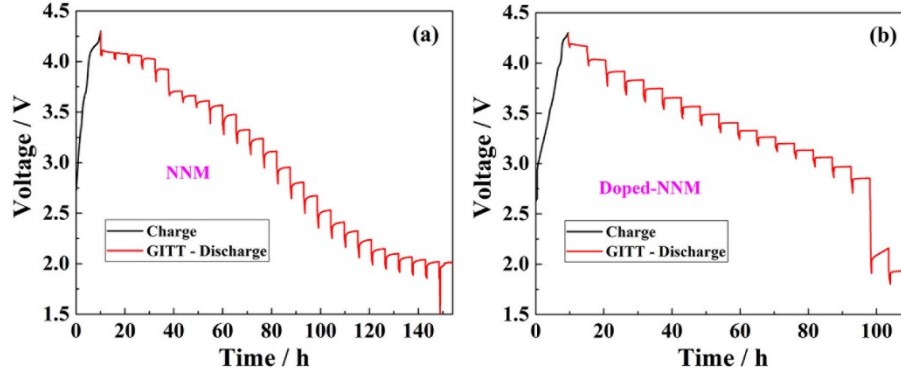

**Figure S4** GITT plots of (a) NNM and (b) doped-NNM cathodes upon discharging at 0.1 C in the voltage range of 2.0 - 4.3 V.

The calculated Na-ion diffusion coefficient by the Galvanostatic intermittent titration (GITT) equation:

$$D_{Na} = \frac{4}{\pi\tau} \left( \frac{m_B V_M}{M_B S} \right)^2 \left( \frac{\Delta E_S}{\Delta E_\tau} \right)^2 \quad (S1)$$

Where  $m_B$ ,  $M_B$  and  $V_M$  correspond to the electrode mass, molecular weight and molar volume of the as-prepared materials;  $S$  is the surface area (0.785 cm<sup>2</sup>), which is calculated from the geometrical area in this work.  $\tau$  (s) is the testing time in each step.  $\Delta E_s$  and  $\Delta E_\tau$  represent the quasi-equilibrium potential and the change of voltage  $E$  during the current pulse, respectively.<sup>1-5</sup>

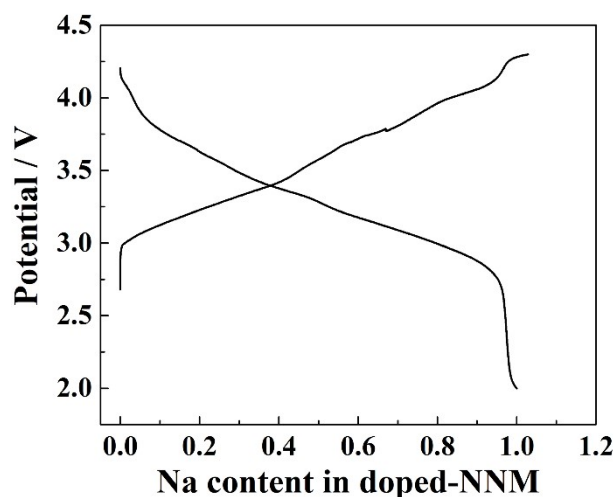

**Figure S5** Normalized charge and discharge profiles of doped-NNM cathode during the in situ XRD experiments.

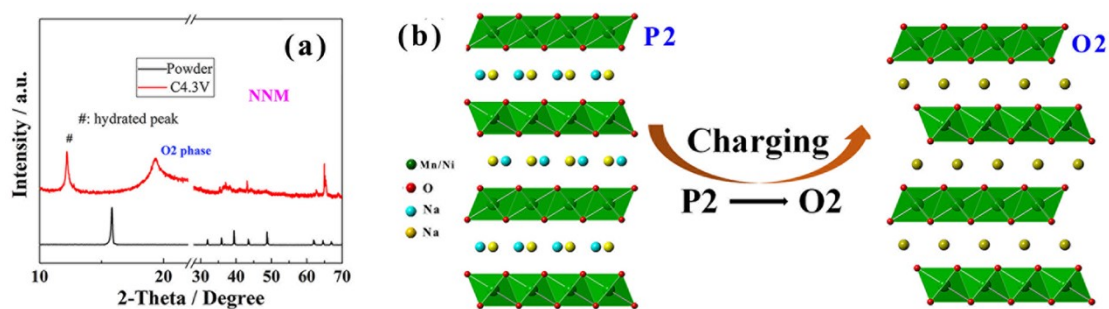

**Figure S6** (a) Ex situ XRD data of undoped NNM cathode, (b) illustration of structural evolution of the pristine NNM cathode.

## REFERENCES

- 1 K. Liu, S. S. Tan, J. Moon, C. J. Jafta, C. Li, T. Kobayashi, H. Lyu, C. A. Bridges, S. Men, W. Guo, Y. F. Sun, J. L. Zhang, M. P. Paranthaman, X. G. Sun and S. Dai, *Adv. Energy Mater.*, 2020, **10**, 2000135.
- 2 J. Jin, Y. Liu, Q. Shen, X. Zhao, J. Zhang, Y. Song, T. Li, X. Xing and J. Chen, *Adv. Funct. Mater.*, 2022, **32**, 2203424.
- 3 C. Zhao, F. Ding, Y. Lu, L. Chen and Y.-S. Hu, *Angew. Chem.-Int. Edit.*, 2020, **59**, 264-269.
- 4 P. Zou, L. Yao, C. Wang, S. J. Lee, T. Li and H. L. Xin, *Angew. Chem. Int. Ed.*, 2023, **62**, e202304628.
- 5 H. Fang, H. Ji, J. Zhai, C. Wang, C. Zhu, G. Chen, M. Chu, T. Zhang, Z. Ma, W. Zhao, W. Ji and Y. Xiao, *Small*, 2023, **19**, 2301360.
